# Supplementary material for: Coupling post-modification with reconstruction over Co-based metal–organic frameworks for electrochemical collective value-added recycling of nitrate and sulfion in wastewater
Source: Royal Society of Chemistry journal article supplement (doi:10.1039/d3ta04629j), 2023-01-01
Supplement: d3ta04629j1.pdf [file d3ta04629j1.pdf]

## Electronic Supplementary Information

### Chemicals and materials

Cobalt nitrate hexahydrate ( $\text{Co}(\text{NO}_3)_2 \cdot 6\text{H}_2\text{O}$ ), 2-methylimidazole, potassium hydroxide (KOH), sodium hydroxide (NaOH), ammonium chloride ( $\text{NH}_4\text{Cl}$ ), ammonium chloride- $^{15}\text{N}$  ( $^{15}\text{NH}_4\text{Cl}$ ), p-aminobenzenesulfonamide, potassium sodium tartrate, potassium nitrate ( $\text{KNO}_3$ ), potassium nitrate- $^{15}\text{N}$  ( $\text{K}^{15}\text{NO}_3$ ), mercuric iodide ( $\text{HgI}_2$ ) and potassium iodide (KI) were obtained from Aladdin (Shanghai, China). hydrochloric acid (HCl) and ethanol ( $\text{C}_2\text{H}_5\text{OH}$ ) were purchased from Beijing Chemical Works. DMAB was purchased from Macklin (Shanghai, China).

### Characterization

The ZEISS Gemini 500 scanning electron microscopy (SEM) and a field emission scanning electron microscope (FE-SEM, HITACHI Regulus 8100) were performed to characterize the morphology of the sample. The related elemental distribution was analyzed with energy-dispersive X-ray spectroscopy (EDS, Oxford Ultim Max 65). The transmission electron microscopy (TEM) and high-resolution TEM (HRTEM) images were obtained by using a Jem2100F.  $^1\text{H}$  NMR spectra were recorded on a superconducting-magnet NMR spectrometer (Bruker AVANCE III HD 500 MHz). X-ray diffraction (XRD) patterns were recorded with a PANalytical Empyrean powder diffractometer using  $\text{Cu K}\alpha$  radiation ( $\lambda = 0.1541 \text{ nm}$ ). X-ray photoelectron spectroscopy (XPS) spectra were conducted on an Thermo ESCALAB 250XI.

### Determination of products

**Nitrate:** The obtained electrolyte was subjected to multiple dilutions. Then, 0.1 mL of HCl (1 M) and 0.01 mL of sulfamic acid solution (0.8 wt%) were introduced to the 5 mL of diluted electrolyte. After allowing it to stand for 10 min, the absorption spectrum was measured using UV-vis

spectrophotometry within the wavelength range of 300-200 nm. The calibration curve was established by employing a series of standard KNO<sub>3</sub> solutions.

**Ammonia:** To prepare Nessler's reagent, 0.7 g of KI and 1 g of HgI<sub>2</sub> were dispersed in 10 mL of 4 M NaOH solution and left in the dark for 24 h. Afterward, 5 mL of the diluted electrolyte, 0.1 mL of Nessler's reagent, and 0.1 mL of potassium sodium tartrate solution were mixed for 20 min. Finally, the absorption spectrum was obtained by UV-vis spectrophotometry. The calibration curve was generated by using a series of standard NH<sub>4</sub>Cl solutions.

### Isotope Labeling Experiments:

Isotope labeling experiments were carried out by using K<sup>15</sup>NO<sub>3</sub> (99%) as the feed nitrogen source to confirm the source and quantify the concentration of NH<sub>3</sub>-N. The <sup>15</sup>NH<sub>4</sub><sup>+</sup> electrolyte was collected after electrolysis for 2 h in 1 M KOH containing 200 ppm K<sup>15</sup>NO<sub>3</sub>-<sup>15</sup>N. The pH value of the post-electrolysis electrolyte was adjusted to 1-2 through 4 M H<sub>2</sub>SO<sub>4</sub>. Then, 50 μL of deuterium oxide (D<sub>2</sub>O) was mixed with 0.5 mL of the acidified electrolyte to obtain further <sup>1</sup>H NMR spectra by the NMR detection.

The conversion efficiency, yield rate and faradaic efficiency (FE) were calculated by using the following formula:

$$\text{Conversion} = \Delta c_{\text{NO}_3^-} / c_0 \times 100\% \quad (1)$$

$$\text{Yield}_{\text{NH}_3} = (c_{\text{NH}_3} \times V) / (M_{\text{NH}_3} \times t \times S) \quad (2)$$

$$\text{FE} = (8F \times c \times V) / Q \quad (3)$$

Where  $\Delta c_{\text{NO}_3^-}$  is the concentration difference of NO<sub>3</sub><sup>-</sup> before and after reduction,  $c_0$  is the initial concentration of NO<sub>3</sub><sup>-</sup>,  $c_{\text{NH}_3}$  is the measured NH<sub>3</sub> concentration,  $V$  is the electrolyte volume,  $t$  is the electrolysis time,  $M_{\text{NH}_3}$  is the molar mass of NH<sub>3</sub>,  $S$  is the geometric area of the catalyst,  $F$  is the Faraday constant (96 485 C mol<sup>-1</sup>), and  $Q$  is the total charge during electrolysis.

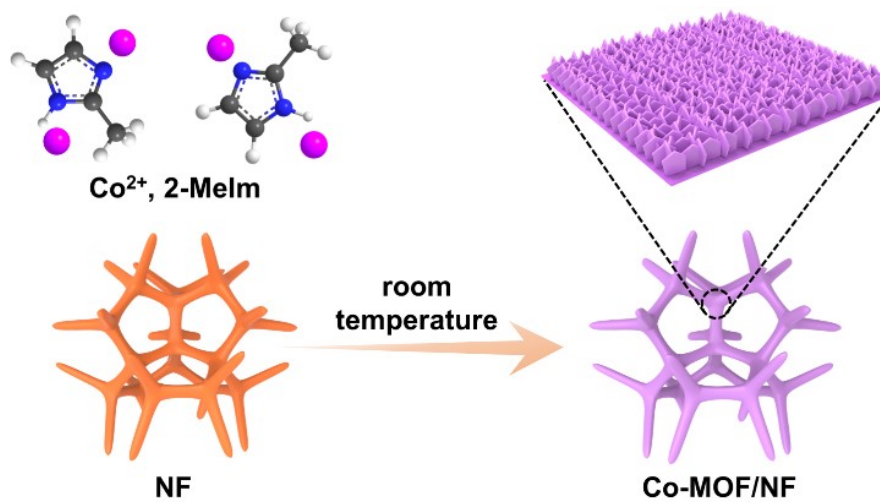

**Fig. S1.** Synthetic Scheme of the Co-MOF/NF.

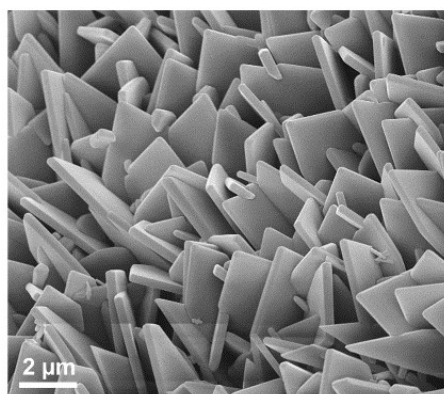

**Fig. S2.** SEM image of Co-MOF/NF.

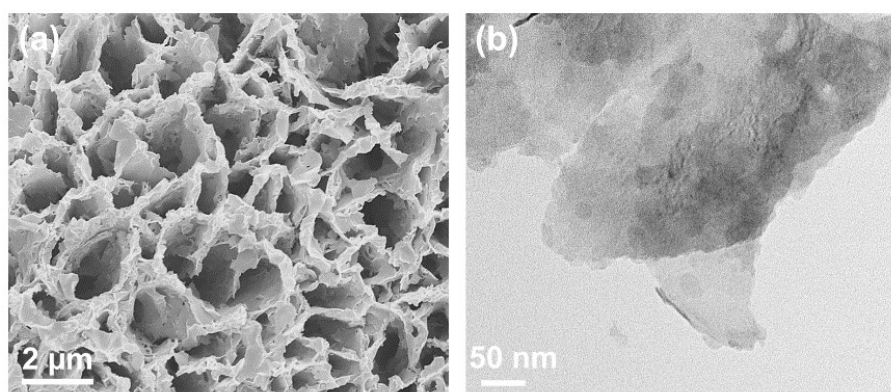

**Fig. S3.** (a) SEM image of DMAB-Co-MOF/NF; (b) TEM image of DMAB-Co-MOF.

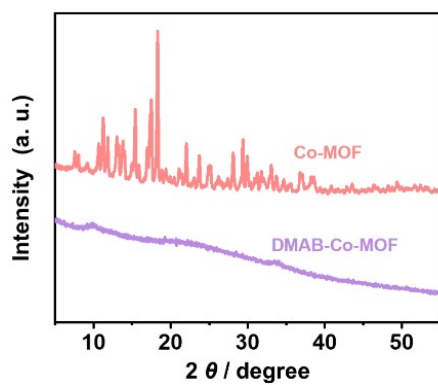

**Fig. S4.** XRD patterns of Co-MOF and DMAB-Co-MOF.

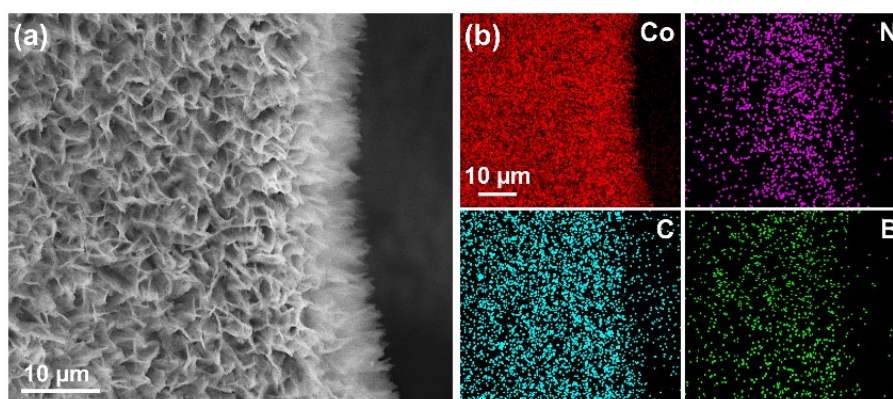

**Fig. S5.** (a) SEM image and (b) corresponding elemental mapping of DMAB-Co-MOF/NF.

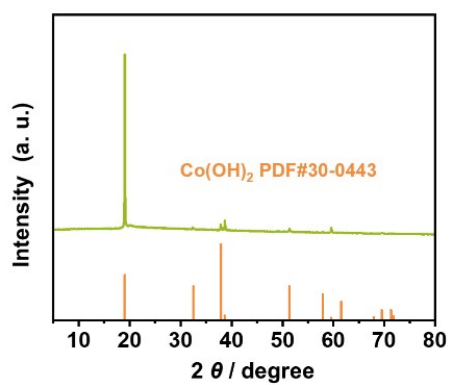

**Fig. S6.** XRD pattern of DMAB-Co-MOF in 1 M KOH after electrolysis.

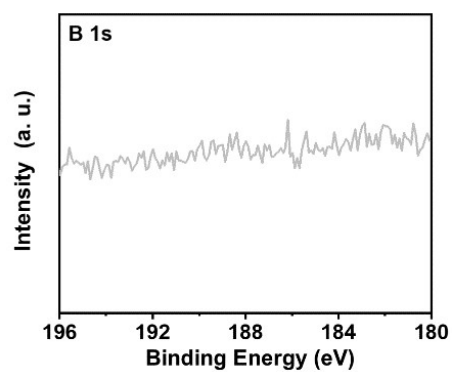

**Fig. S7.** B 1s XPS spectrum of CoOOH/Co(OH)<sub>2</sub>.

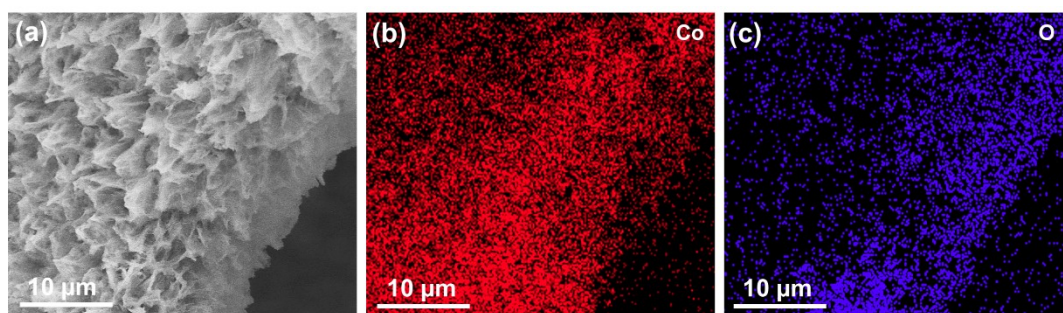

**Fig. S8.** (a) SEM image and (b and c) corresponding elemental mapping of CoOOH/Co(OH)<sub>2</sub>/NF.

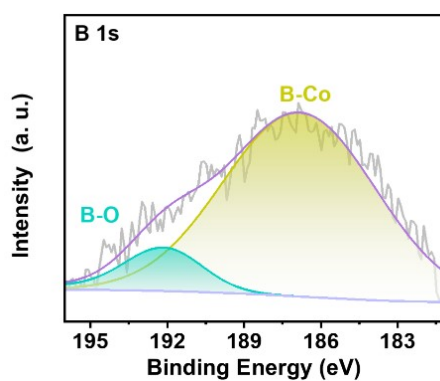

**Fig. S9.** B 1s XPS spectrum of B-Co-S.



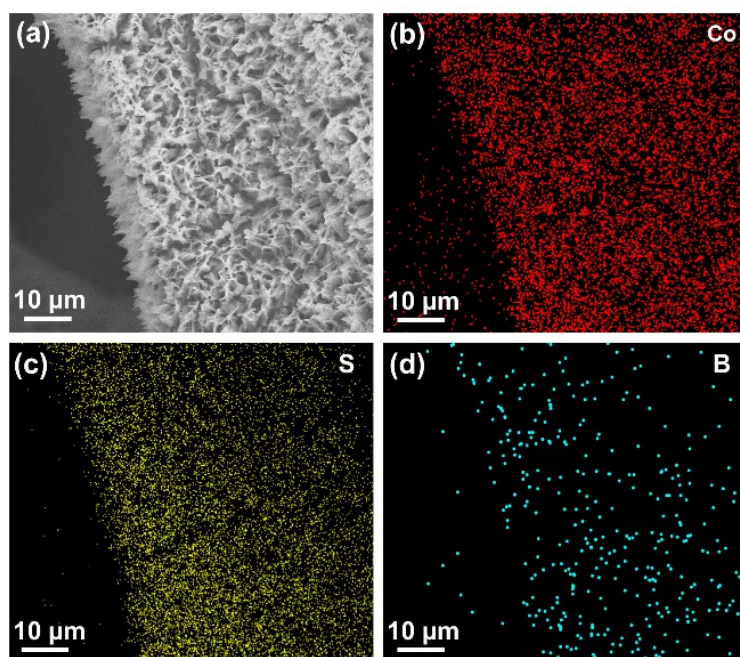

**Fig. S10.** (a) SEM image and (b, c and d) corresponding elemental mapping of B-Co-S/NF.

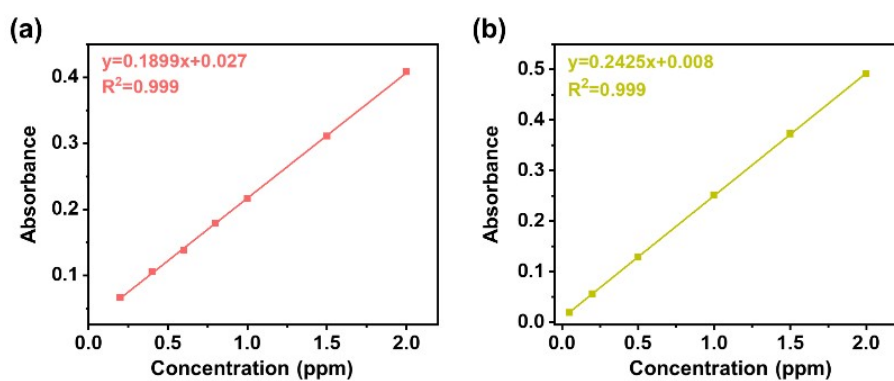

**Fig. S11.** Calibration curves used to estimate the concentrations of (a) NO<sub>3</sub><sup>-</sup>-N and (b) NH<sub>3</sub>-N.

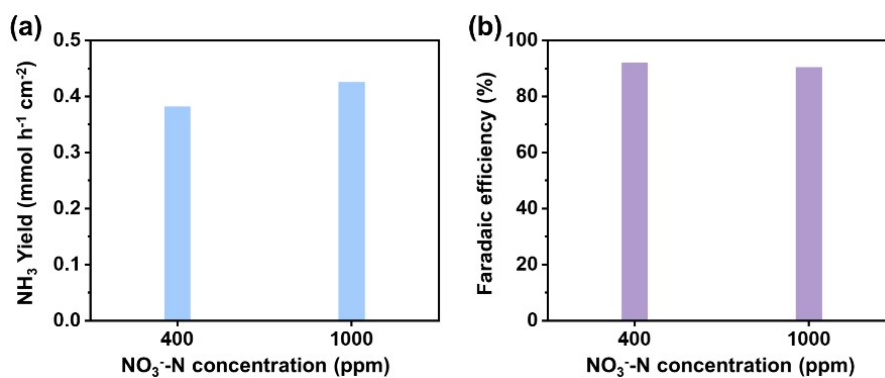

**Fig. S12.** (a) NH<sub>3</sub> yield rates and (b) NH<sub>3</sub> FE of CoOOH/Co(OH)<sub>2</sub>/NF at different concentrations of NO<sub>3</sub><sup>-</sup>-N.

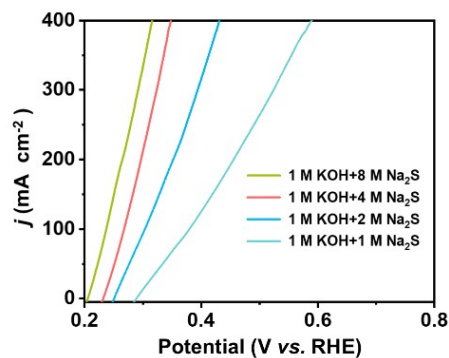

**Fig. S13.** LSV curves of B-Co-S/NF in different concentrations of  $\text{Na}_2\text{S}$ .

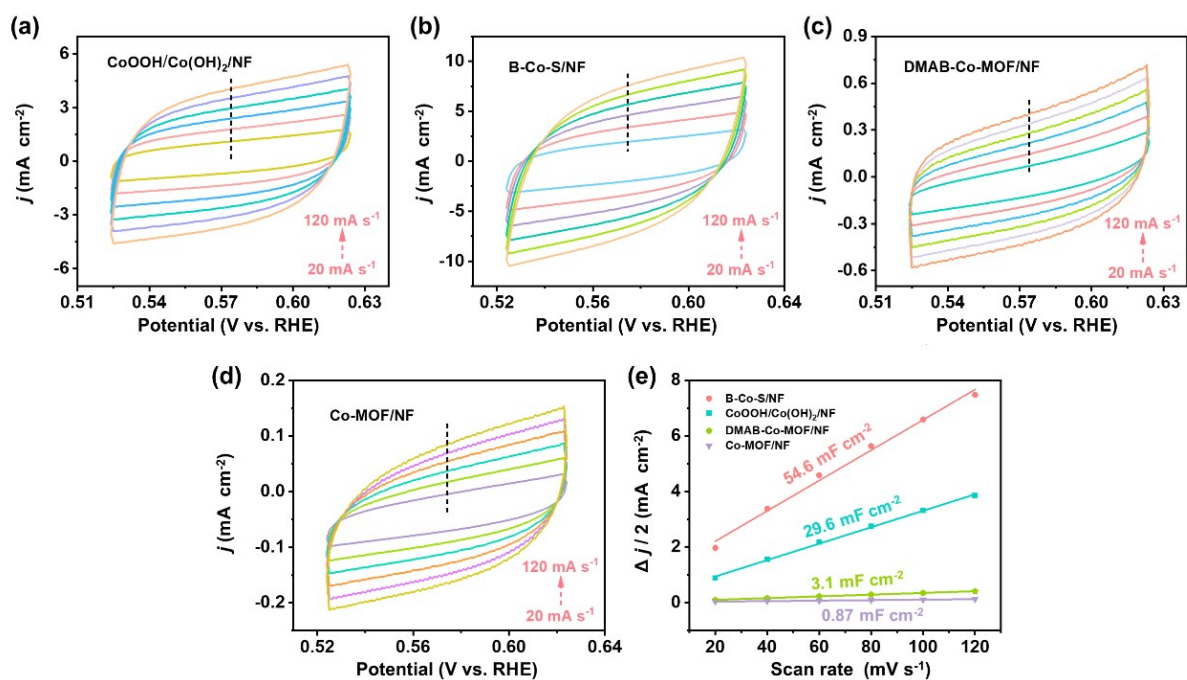

**Fig. S14.** CV curves of (a)  $\text{CoOOH}/\text{Co}(\text{OH})_2/\text{NF}$ , (b) B-Co-S/NF, (c) DMAB-Co-MOF/NF and (d) Co-MOF/NF with various scan rates from 20 to 120  $\text{mV s}^{-1}$ . (e) Plots of the current density versus the scan rate for  $\text{CoOOH}/\text{Co}(\text{OH})_2/\text{NF}$ , B-Co-S/NF, DMAB-Co-MOF/NF and Co-MOF/NF with various scan rates from 20 to 120  $\text{mV s}^{-1}$  at 0.574 V vs. RHE.

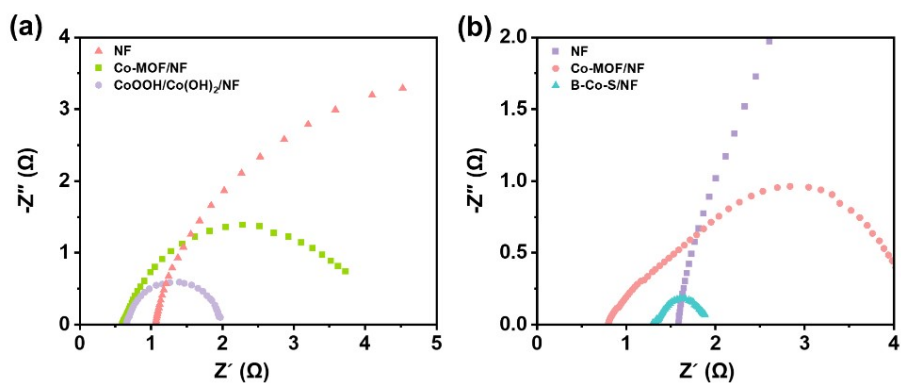

**Fig. S15.** EIS spectra of various catalysts in (a) 1 M KOH with 200 ppm KNO<sub>3</sub>-N at -0.23 V vs. RHE and (b) 1 M KOH with 4 M Na<sub>2</sub>S at 0.27 V vs. RHE.

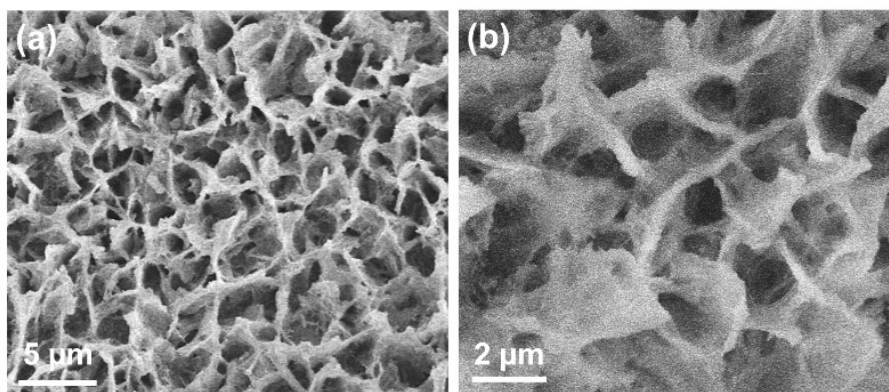

**Fig. S16.** SEM images of (a) CoOOH/Co(OH)<sub>2</sub>/NF for NRA and (b) B-Co-S/NF for SOR after long-term stability testing.

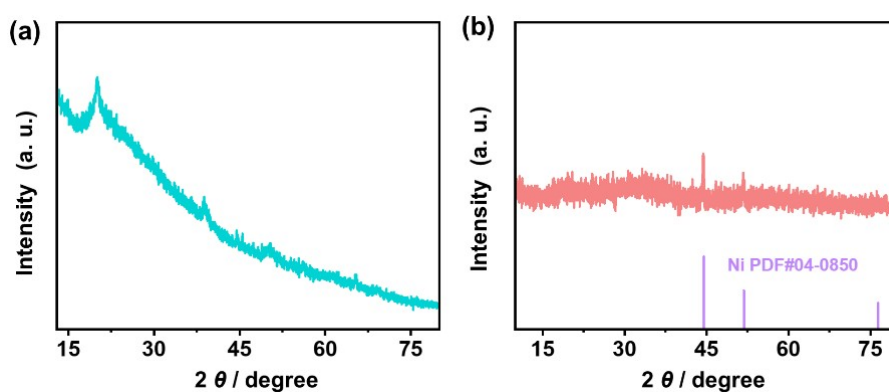

**Fig. S17.** XRD patterns of (a) CoOOH/Co(OH)<sub>2</sub>/NF for NRA and (b) B-Co-S/NF for SOR after long-term stability testing.



**Table S1.** The NRA performance comparison between the CoOOH/Co(OH)<sub>2</sub>/NF and some other reported electrocatalysts.

| Electrocatalysts                   | Electrolytes                                                                              | NH <sub>3</sub> FE | NH <sub>3</sub> yield rate                                                      | Ref.             |
|------------------------------------|-------------------------------------------------------------------------------------------|--------------------|---------------------------------------------------------------------------------|------------------|
| <b>CoOOH/Co(OH)<sub>2</sub>/NF</b> | <b>1 M KOH+ 200 ppm KNO<sub>3</sub>-N</b>                                                 | <b>94.16%</b>      | <b>0.238 mmol h<sup>-1</sup> cm<sup>-2</sup><br/>at -0.2 V vs. RHE</b>          | <b>This work</b> |
| Cu/Cu <sub>2</sub> O               | 0.01 M KOH+0.5 M Na <sub>2</sub> SO <sub>4</sub> +<br>100 mM NO <sub>3</sub> <sup>-</sup> | 88.0 ±<br>1.6%     | 583.6 ± 2.4 μmol cm <sup>-2</sup> h <sup>-1</sup><br>at -1.0 V vs. RHE          | 1                |
| PdMoCu                             | 1 M KOH + 0.1 M KNO <sub>3</sub>                                                          | 56.95%             | 250.4 μmol h <sup>-1</sup> cm <sup>-2</sup><br>at -0.6 V vs. RHE                | 2                |
| CoO@NCNT/GP                        | 0.1 M NaOH + 0.1 M NaNO <sub>3</sub>                                                      | 93.8±1.5<br>%      | 9041.6±370.7 mg h <sup>-1</sup> cm <sup>-2</sup><br>at -0.6 V vs. RHE           | 3                |
| Pd10Cu/BCN                         | 0.1 M KOH + 100 mM NO <sub>3</sub> <sup>-</sup>                                           | 91.74%             | 102,153 μg h <sup>-1</sup> mg <sub>cat</sub> <sup>-1</sup> at<br>-0.6 V vs. RHE | 4                |
| CuCoSP                             | 0.1 M KOH + 0.1 M NO <sub>3</sub> <sup>-</sup>                                            | 93.3 ±<br>2.1%     | 1.17 mmol h <sup>-1</sup> cm <sup>-1</sup><br>at -0.175 V vs. RHE               | 5                |
| In-S-G                             | 1 M KOH + 0.1 M KNO <sub>3</sub>                                                          | 75%                | 220 mmol h <sup>-1</sup> g <sub>cat</sub> <sup>-1</sup><br>at -0.5 V vs. RHE    | 6                |
| Ag/ZnO                             | 1 M KOH + 0.1 M KNO <sub>3</sub>                                                          | 66%                | 516 mmol g <sub>cat</sub> <sup>-1</sup> h <sup>-1</sup><br>at -0.6 V vs. RHE    | 7                |
| Bi-X <sub>red</sub>                | 1 M KOH + 0.5 M NO <sub>3</sub> <sup>-</sup>                                              | 90.6%              | 46.5 g h <sup>-1</sup> g <sub>cat</sub> <sup>-1</sup><br>at -0.8 V vs. RHE      | 8                |
| Cu-N-C SAC                         | 0.1 M KOH + 0.1 M KNO <sub>3</sub>                                                        | 84.7%              | 4.5 mg cm <sup>-2</sup> h <sup>-1</sup><br>at -1 V vs. RHE                      | 9                |
| Cu <sub>2</sub> O/Cu               | 1 M KOH + 250 mg L <sup>-1</sup> NO <sub>3</sub> <sup>-</sup>                             | 84.36%             | 2.17 mg cm <sup>-2</sup> h <sup>-1</sup><br>at -0.25 V vs. RHE                  | 10               |

**Table S2.** The SOR performance comparison between the B-Co-S/NF and some other reported electrocatalysts.

| Electrocatalysts                       | Electrolytes                       | Potential (V) at 100 mA cm <sup>-2</sup> | Ref.             |
|----------------------------------------|------------------------------------|------------------------------------------|------------------|
| <b>B-Co-S/NF</b>                       | <b>1 M KOH+1 M Na<sub>2</sub>S</b> | <b>0.380</b>                             | <b>This work</b> |
|                                        | <b>1 M KOH+4 M Na<sub>2</sub>S</b> | <b>0.268</b>                             |                  |
| CoS <sub>2</sub> @C/MXene/NF           | 1 M NaOH+1 M Na <sub>2</sub> S     | 0.389                                    | 11               |
| NiSe/NF                                | 1 M NaOH+1 M Na <sub>2</sub> S     | 0.490                                    | 12               |
| TPA@Ni <sub>3</sub> S <sub>2</sub> /NF | 1 M NaOH+1 M Na <sub>2</sub> S     | 0.480                                    | 13               |
| CuCoS/CC                               | 1 M NaOH+4 M Na <sub>2</sub> S     | ~0.320                                   | 14               |
| Cu <sub>2</sub> S/NF                   | 1 M NaOH+1 M Na <sub>2</sub> S     | 0.440                                    | 15               |
| CoNi@NGs                               | 1 M NaOH+1 M Na <sub>2</sub> S     | 0.520                                    | 16               |
| Co-Ni <sub>3</sub> S <sub>2</sub>      | 1 M NaOH+1 M Na <sub>2</sub> S     | 0.590                                    | 17               |
| HEDP-Rh metallene                      | 1 M KOH+4 M Na <sub>2</sub> S      | 0.583                                    | 18               |

## References

1. Y. Bu, C. Wang, W. Zhang, X. Yang, J. Ding and G. Gao, *Angew. Chem., Int. Ed.*, 2023, **62**, e202217337.
2. X. Tong, Z. Zhang, Z. Fang, J. Guo, Y. Zheng, X. Liang, R. Liu, L. Zhang and W. Chen, *J. Phys. Chem. C*, 2023, **127**, 5262-5270.
3. Q. Chen, J. Liang, L. Yue, Y. Luo, Q. Liu, N. Li, A. A. Alshehri, T. Li, H. Guo and X. Sun, *Chem. Commun.*, 2022, **58**, 5901-5904.
4. X. Zhao, X. Jia, H. Zhang, X. Zhou, X. Chen, H. Wang, X. Hu, J. Xu, Y. Zhou, H. Zhang and G. Hu, *J. Hazard. Mater.*, 2022, **434**, 128909.
5. W. He, J. Zhang, S. Dieckhofer, S. Varhade, A. C. Brix, A. Lielpetere, S. Seisel, J. R. C. Junqueira and W. Schuhmann, *Nat. Commun.*, 2022, **13**, 1129.
6. F. Lei, W. Xu, J. Yu, K. Li, J. Xie, P. Hao, G. Cui and B. Tang, *Chem. Eng. J.*, 2021, **426**, 131317.
7. F. Lei, K. Li, M. Yang, J. Yu, M. Xu, Y. Zhang, J. Xie, P. Hao, G. Cui and B. Tang, *Inorg. Chem. Front.*, 2022, **9**, 2734-2740.
8. N. Zhang, J. Shang, X. Deng, L. Cai, R. Long, Y. Xiong and Y. Chai, *ACS Nano*, 2022, **16**, 4795-4804.
9. J. Yang, H. Qi, A. Li, X. Liu, X. Yang, S. Zhang, Q. Zhao, Q. Jiang, Y. Su, L. Zhang, J. F. Li, Z. Q. Tian, W. Liu, A. Wang and T. Zhang, *J. Am. Chem. Soc.*, 2022, **144**, 12062-12071.
10. W. Fu, Z. Hu, Y. Zheng, P. Su, Q. Zhang, Y. Jiao and M. Zhou, *Chem. Eng. J.*, 2022, **433**, 133680.
11. L. Zhang, Z. Wang and J. Qiu, *Adv. Mater.*, 2022, **34**, e2109321.
12. C. Duan, C. Tang, S. Yu, L. Li, J. Li and Y. Zhou, *Appl. Catal. B: Environ.*, 2023, **324**, 122255.
13. L. Jin, C. Chen, L. Hu, X. Liu, Y. Ding, J. He, H. Li, N. Li, D. Chen, Q. Xu and J. Lu, *Applied Surface Science*, 2022, **605**, 154756.
14. H. Yu, W. Wang, Q. Mao, K. Deng, Y. Xu, Z. Wang, X. Li, H. Wang and L. Wang, *J. Mater. Chem. A*, 2023, **11**, 2218-2224.
15. Y. Pei, J. Cheng, H. Zhong, Z. Pi, Y. Zhao and F. Jin, *Green Chem.*, 2021, **23**, 6975-6983.
16. M. Zhang, J. Guan, Y. Tu, S. Chen, Y. Wang, S. Wang, L. Yu, C. Ma, D. Deng and X. Bao, *Energy Environ. Sci.*, 2020, **13**, 119-126.
17. Y. Li, Y. Duan, K. Zhang and W. Yu, *Chem. Eng. J.*, 2022, **433**, 134472.
18. Z. Wang, G. Yang, P. Tian, X. Li, K. Deng, H. Yu, Y. Xu, H. Wang and L. Wang, *Chem. Eng. J.*, 2023, **473**, 145147.
